# Supplementary material for: The Relation between Physiological Parameters and Colour Modifications in Text Background and Overlay during Reading in Children with and without Dyslexia
Source: MDPI journal article supplement (doi:10.3390/brainsci11050539), 2021-04-25
Supplement: s1 [file s1]

**Supplement Table S1.** All background/overlay colours compared with white colour for each parameter in the groups (dyslexic with orange colour; non-dyslexic with green,  $p < 0.05$ )

| Colours                        | Red  | Blue | Yellow | Orange | Purple | Turquoise | Red O | Turquoise O | Blue O | Orange O | Purple O | Yellow O |
|--------------------------------|------|------|--------|--------|--------|-----------|-------|-------------|--------|----------|----------|----------|
| Reading duration (ms)          |      |      | .048   | .043   |        |           |       | .000        |        |          |          |          |
| Fixation Count                 |      |      |        | .006   |        |           |       | .001        |        | .047     |          |          |
| Fixation Frequency (count/s)   |      | .051 |        |        |        |           |       | .021        |        |          |          |          |
| Fixation Duration Total (ms)   |      | .000 |        | .025   |        |           |       | .016        |        |          |          |          |
| Fixation Duration Average (ms) |      | .043 |        |        |        |           |       | .025        |        | .014     |          |          |
| Saccade Count                  |      | .019 |        | .021   |        |           | .021  |             |        | .017     |          |          |
| Saccade Frequency (count/s)    | .000 | .000 |        |        |        |           | .035  | .000        |        | .050     |          | .051     |
| Saccade Duration Total (ms)    | .000 | .000 |        |        |        | .053      |       |             |        | .035     |          |          |
| Saccade Duration Average (ms)  |      |      |        |        |        |           |       |             |        |          |          |          |
| Alpha ( $\mu V^2$ )            |      |      |        |        |        |           |       |             |        |          |          |          |
| Beta ( $\mu V^2$ )             |      |      |        |        | .010   | .029      | .024  | .023        |        |          | .052     |          |
| Delta ( $\mu V^2$ )            |      |      |        |        |        |           |       |             |        |          |          |          |
| Theta ( $\mu V^2$ )            |      |      |        |        |        |           |       | .003        |        |          |          |          |
| Whole range ( $\mu V^2$ )      |      |      |        |        |        |           |       |             |        |          |          |          |
| EDA(uS)                        |      |      |        |        |        |           |       |             |        |          |          |          |
| Mean RR (ms)                   | .043 | .028 |        |        |        | .013      |       |             |        | .022     |          | .033     |
| STD RR (ms)                    |      |      |        |        |        |           |       |             |        |          |          |          |
| Mean HR (beats/min)            |      | .033 |        |        |        | .015      |       |             |        | .024     |          | .032     |
| STD HR (beats/min)             |      |      |        |        |        |           |       |             |        |          |          |          |
| RMSSD (ms)                     |      |      |        |        |        |           |       |             |        |          |          |          |
| CVRR=SDRR/MeanRR (ms)          |      |      |        |        |        |           |       |             |        |          |          |          |

\* Wilcoxon Signed Ranks Test (Reading duration, Eye-tracking, EEG); \*\* Paired Samples Test (EDA, HRV).
